# Supplementary material for: c-Myc dysregulation is a co-transforming event for nuclear factor-κB activated B cells
Source: PubMed Central journal article supplement — Haematologica. 2017 May;102(5):883–94. doi: 10.3324/haematol.2016.156281 (PMC5477607; doi:10.3324/haematol.2016.156281), 2017-05
Supplement: 2016_156281-Disclosures_and_Contributions.pdf [file 2016_156281-Disclosures_and_Contributions.pdf]

Haematologica  
HAEMATOL/2016/156281  
Version 3

C-Myc dysregulation is a co-transforming event for NF- $\kappa$ B activated  
B-cells

Amandine David, Nicolas Arnaud, Magali Fradet, H el ene Lascaux,  
Catherine Ouk-Martin, Nathalie Gachard, Ursula Zimmer-Strobl, Jean  
Feuillard, and Nathalie Faumont

Disclosures: 1. Information on support received for the work under consideration for publication: The group of J Feuillard is supported by grants from the Ligue National contre le Cancer (Equipe Labellisee Ligue), the Institut National contre le Cancer (INCa), the Comite Orientation Recherche Cancer (CORC), the Limousin Region and the Haute Vienne and Correze comitees of the Ligue Nationale contre le Cancer and by the Lyons Club of Corr ze. U Zimmer Strobl was supported by the DFG grant: GZ: ZI 1382/4-1. 2. Information on support received for work outside the submitted work: the authors had no financial relationships (regardless of amount of compensation) with commercial entities during the 36 months prior to publication. 3. Information on patents or copyright: there is no patent relevant to the work

Contributions: A.D., and N.A. performed and analyzed experiments. M.F., H.L., C.O.M., and N.G performed experiments. U.Z.S. participated to the design of the study and contributed to the writing of the manuscript. J.F. and N.F. directed the study, contributed to the experiments, analysed the results and wrote the manuscript.
